# Supplementary material for: Cleavage of Oligonucleotides Containing a P3’→N5’ Phosphoramidate Linkage Mediated by Single-Stranded Oligonucleotide Templates
Source: MDPI journal article supplement (doi:10.3390/molecules161210695), 2011-12-20
Supplement: s1 [file s1]

# Supplementary Materials

## 1. UV melting experiments

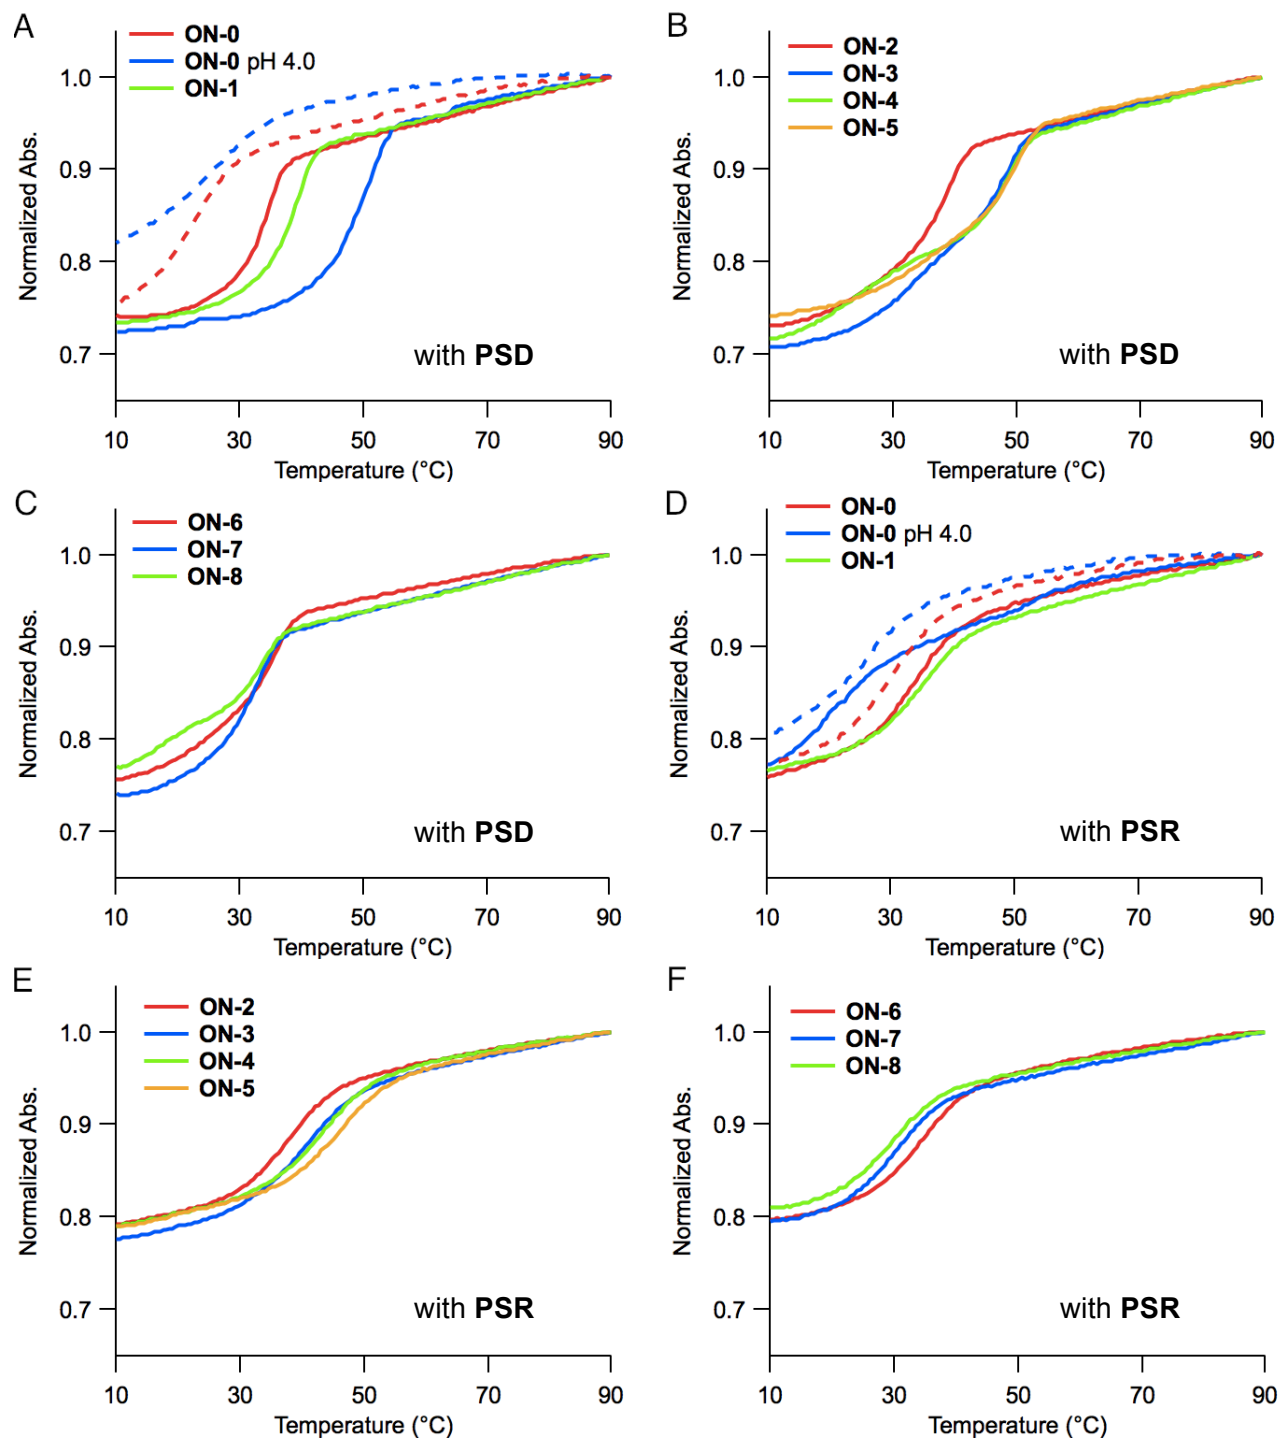

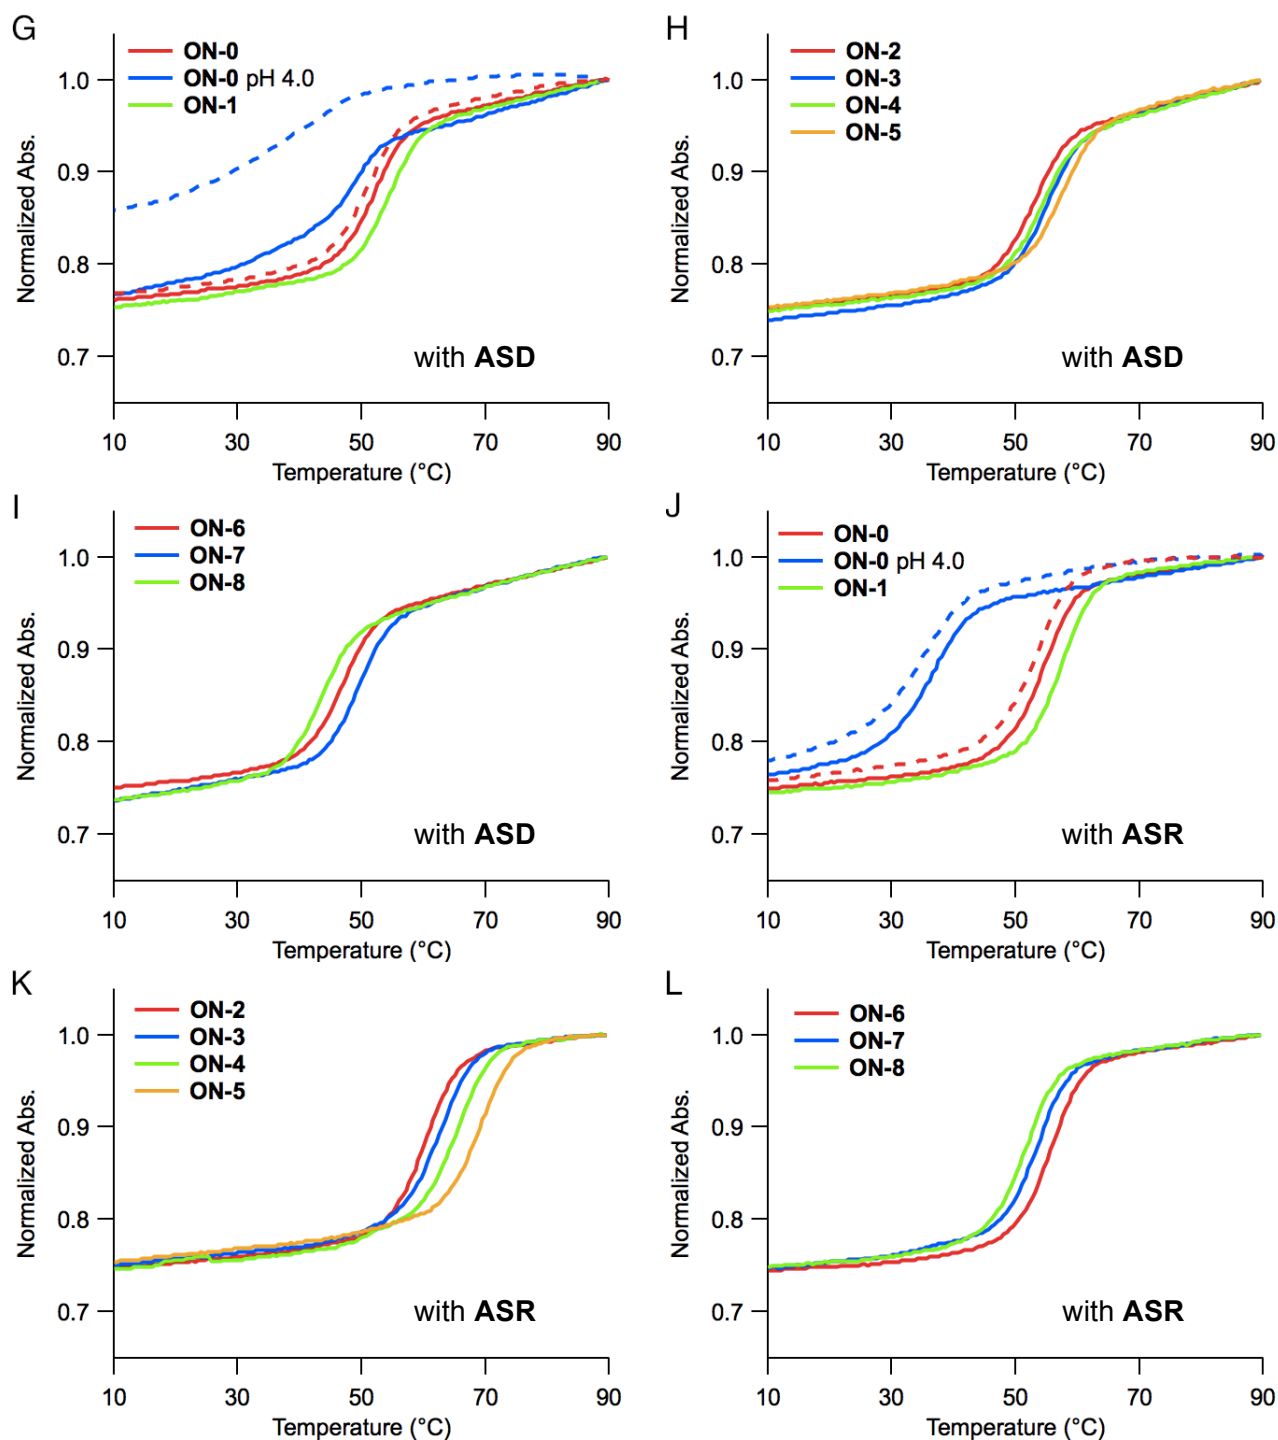

**Figure S1.** Melting profiles of **ON-0–ON-8** with **PSD** (A–C), **PSR** (D–F), **ASD** (G–I) and **ASR** (J–L). Melting experiments were performed in a solution buffered to pH 6.0 unless otherwise specified. The cooling processes are given for the duplexes containing **ON-0** by dashed lines. Conditions: 1.5  $\mu$ M each strand, 140 mM KCl, 10 mM MgCl<sub>2</sub>, 1.0 mM sodium phosphate and 10 mM sodium citrate (pH 6.0) or 10 mM sodium citrate-HCl (pH 4.0).

## 2. Hydrolysis experiments

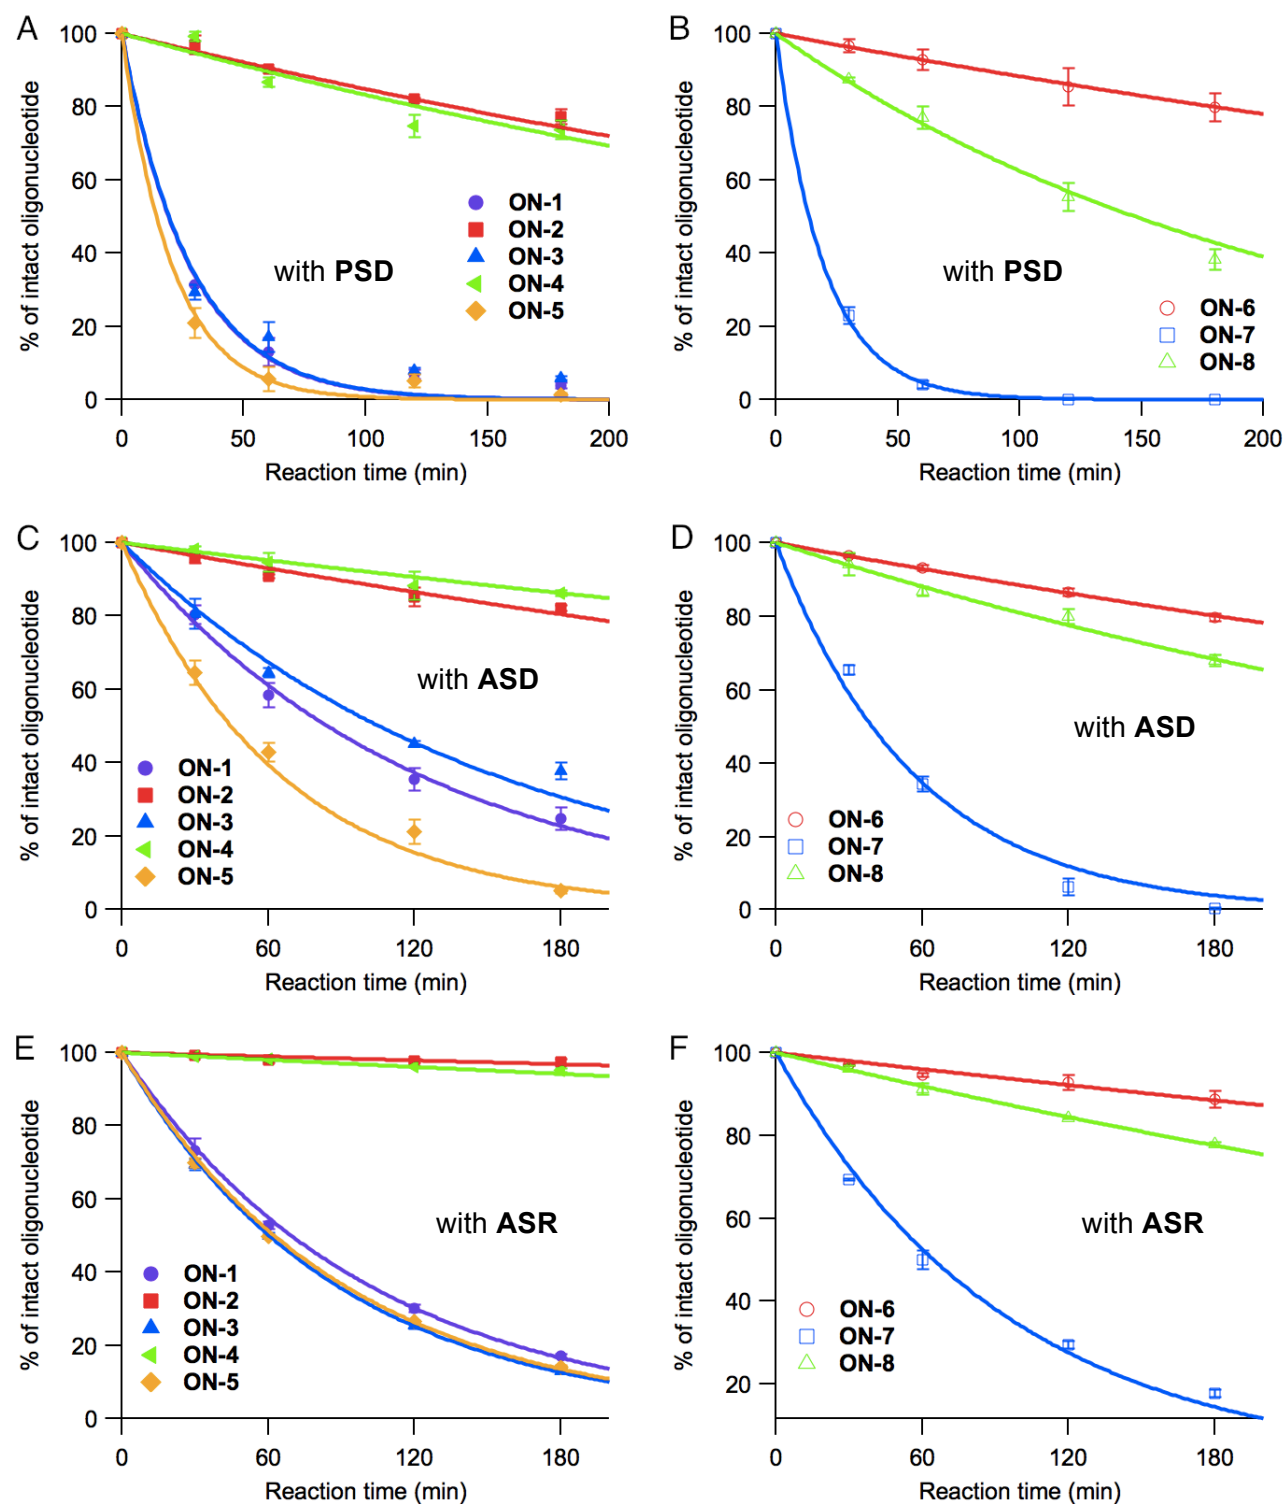

**Figure S2.** Cleavage profiles of ON-1–ON-8 in the presence of PSD (A, B), ASD (C, D) and ASR (E, F) at pH 4.0, 40°C.

Hydrolysis experiments were performed in a solution buffered to pH 4.0 containing 140 mM KCl, 10 mM MgCl<sub>2</sub>, 1.0 mM sodium phosphate, 10 mM sodium citrate-HCl, 3.35  $\mu$ M each strand, at 40°C.

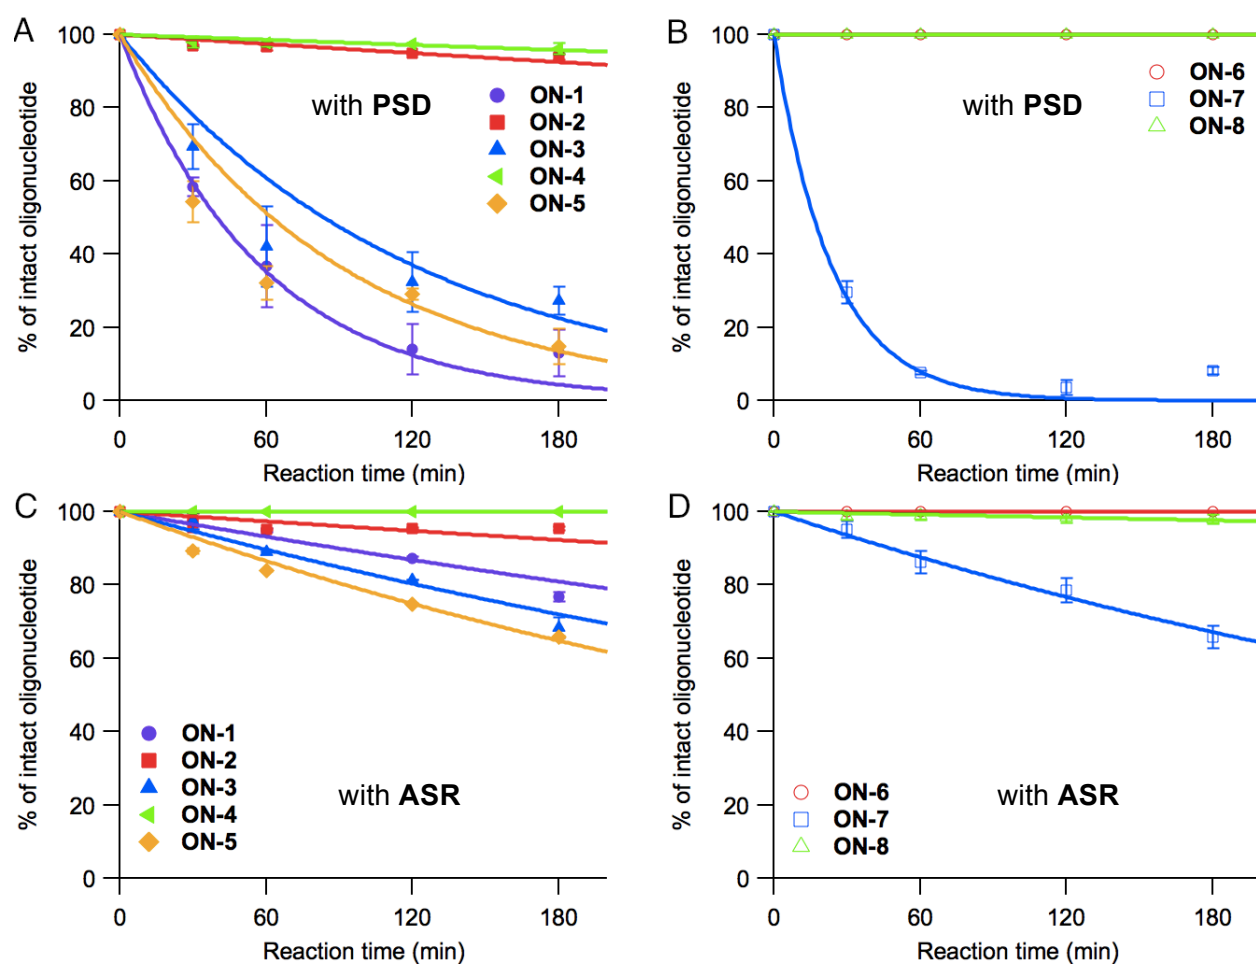

**Figure S3.** Cleavage profiles of ON-1–ON-8 in the presence of PSD (A, B) and ASR (E, F) at pH 4.0, 20°C.

Hydrolysis experiments were performed at 20°C, see Figure S2 caption.



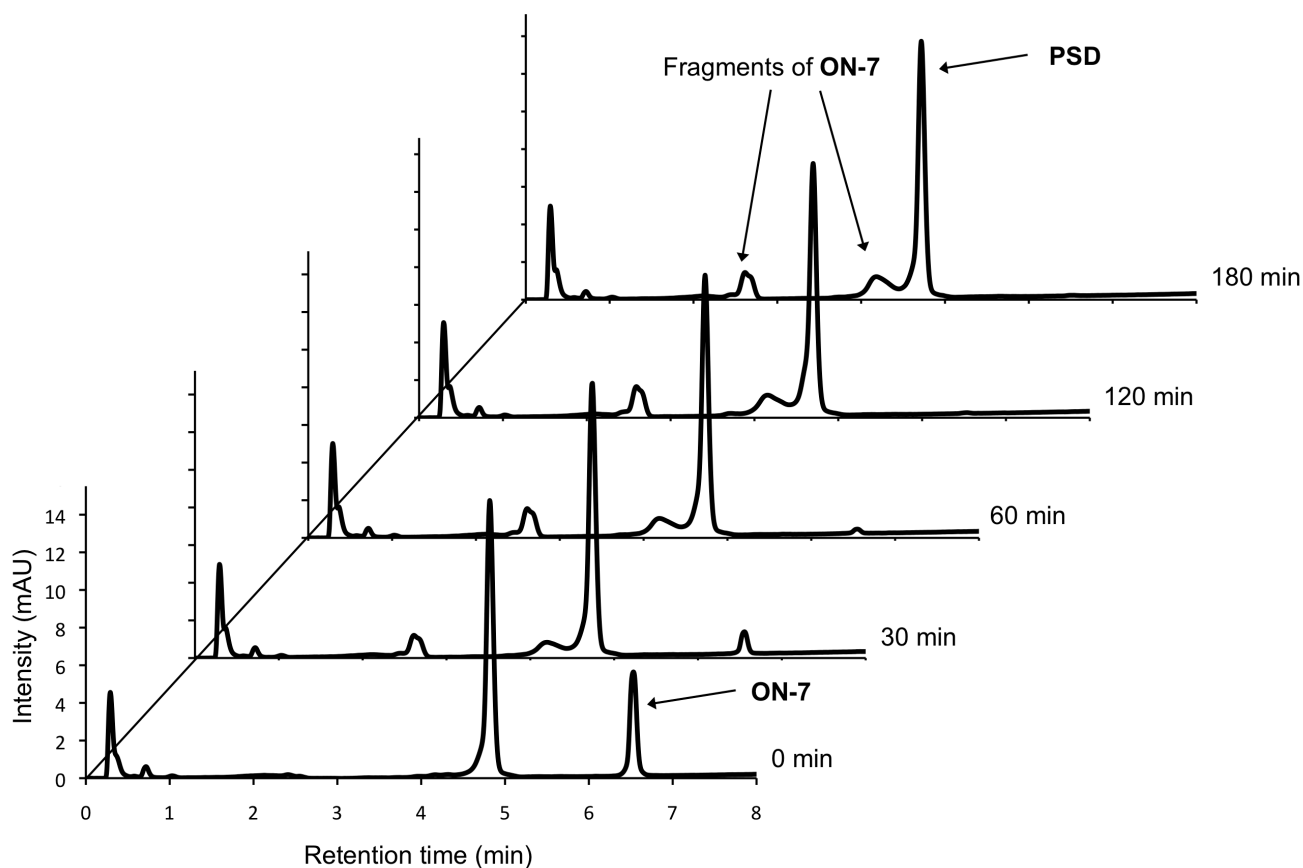

**Figure S4.** HPLC profile of the reaction of **ON-7** with **PSD** at 40°C.

The HPLC system used for the analysis of the reactions was composed of the following components: a Shimadzu CTO-20A column oven, a SPD-20A UV detector, a LC-20AB pump, a SIL-20A auto sampler, a DGU-20A3 online degasser, CBM-20A system controller and an LCsolution HPLC workstation software. Reversed-phase HPLC was run using a Kinetex<sup>TM</sup> C18 column (2.6  $\mu$ m 3.0 $\times$ 50 mm) [buffer **A**, 0.1 M TEAA (pH 7.0); buffer **B**, 0.1 M TEAA (pH 7.0)/MeCN = 1:1; linear gradient, **B** 14 to 30%/7 min; flow rate, 1.0 mL/min; detection, 260 nm].

## 3. Molecular modeling

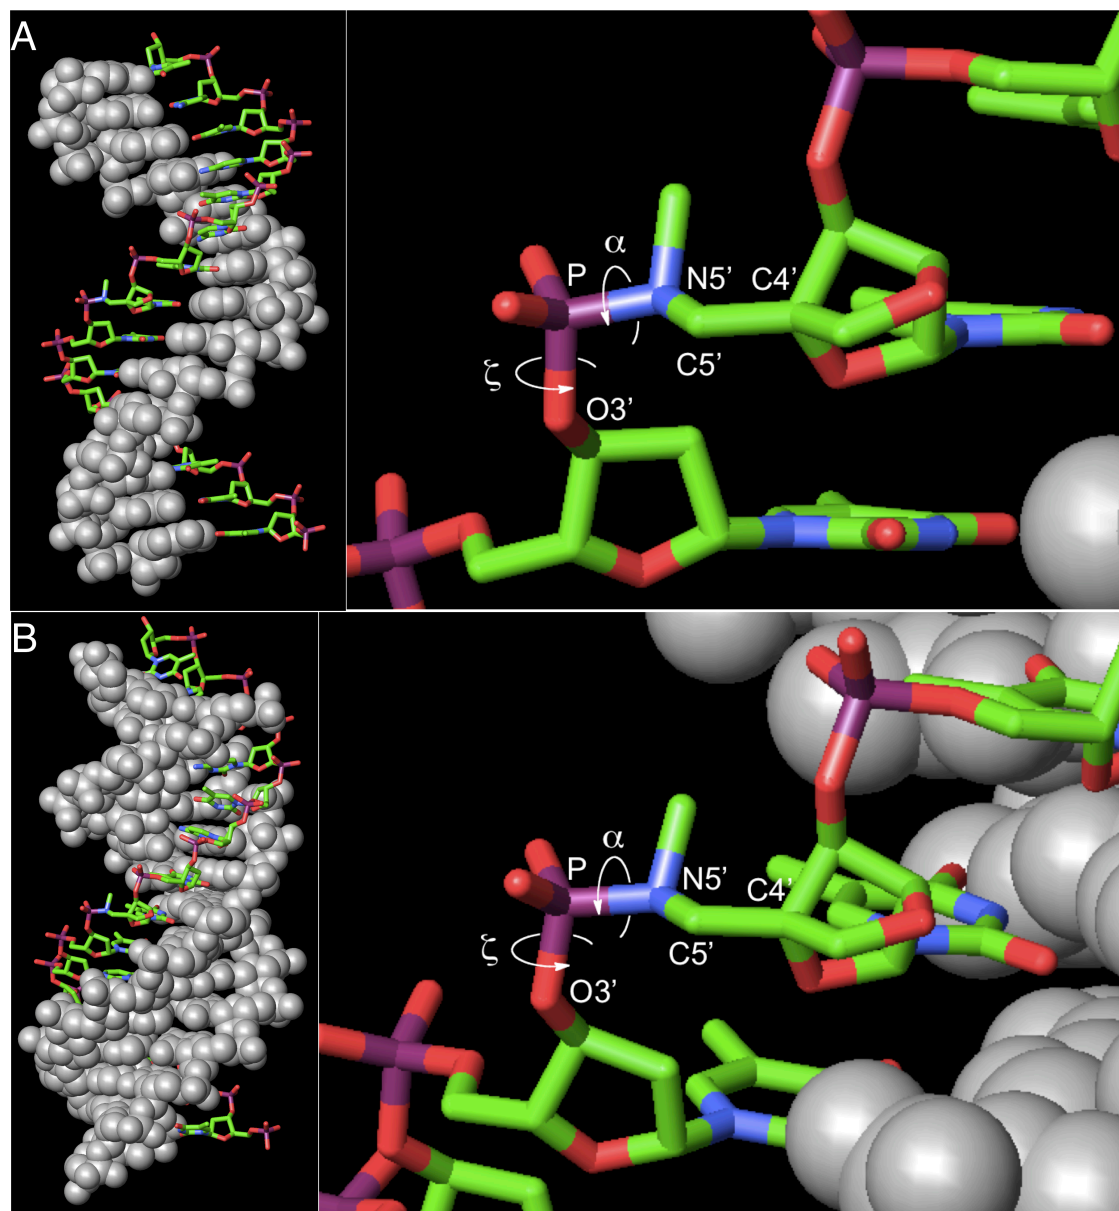

**Figure S5.** Molecular models of the duplex **ON-1•ASR** (A) and the triplex **ON-1•PDD** (B). **ON-1** rendered as stick models (colored by element), **ASR** and **PDD** rendered as space-filling models (gray).  $\alpha$ : O3'-P-N5'-C5',  $\zeta$ : C3'-O3'-P-N5'.
